# Supplementary material for: Control of Established Colon Cancer Xenografts Using a Novel Humanized Single Chain Antibody-Streptococcal Superantigen Fusion Protein Targeting the 5T4 Oncofetal Antigen
Source: PLOS journal article supplement (doi:10.1371/journal.pone.0095200), 2014-04-15
Supplement: S1 (10.1371/journal.pone.0095200.s001) [file journal.pone.0095200.s001]

**Table S1. Plasmids used in this study.**

| Plasmid name                                               | Relevant characteristics <sup>a</sup>                                                                                                                                                                                                 | Source     |
|------------------------------------------------------------|---------------------------------------------------------------------------------------------------------------------------------------------------------------------------------------------------------------------------------------|------------|
| pET-41a(+)                                                 | Protein expression vector; Km <sup>r</sup>                                                                                                                                                                                            | Novagen    |
| pET-41a(+):TEV                                             | Protein expression vector with modified protease cleavage site; Km <sup>r</sup>                                                                                                                                                       | This study |
| pET-32a (+)                                                | Protein expression vector; Ap <sup>r</sup>                                                                                                                                                                                            | Novagen    |
| pET-32a (+):TEV                                            | Protein expression vector with modified protease cleavage site; Ap <sup>r</sup>                                                                                                                                                       | This study |
| pBirACm                                                    | pACYC184 with inducible biotin ligase; Cm <sup>r</sup>                                                                                                                                                                                | Avidity    |
| pET-41a::TEV::speC <sub>WT</sub> ::biotin                  | speC inserted into <i>NcoI</i> and <i>Bam</i> HI of pET-41a with a C-terminal biotin tag; Km <sup>r</sup>                                                                                                                             | This study |
| pET-41a::TEV::speC <sub>Y15A</sub>                         | speC <sub>Y15A</sub> inserted into <i>NcoI</i> and <i>Bam</i> HI sites of pET-41a; Km <sup>r</sup>                                                                                                                                    | [34]       |
| pET-41a::TEV::speC <sub>D203A</sub>                        | speC <sub>D203A</sub> inserted into <i>NcoI</i> and <i>Bam</i> HI sites of pET-41a; Km <sup>r</sup>                                                                                                                                   | [35]       |
| pET-41a::TEV::speC <sub>Y15A/D203A</sub>                   | speC <sub>Y15A/D203A</sub> inserted into <i>NcoI</i> and <i>Bam</i> HI sites of pET-41a; Km <sup>r</sup>                                                                                                                              | This study |
| pUC57::scFv5T4::biotin                                     | Codon optimized scFv5T4 sequence with <i>NcoI</i> and <i>Hind</i> III sites; C-terminal biotin tag; Ap <sup>r</sup>                                                                                                                   | GenScript  |
| pET-32a::scFv5T4::mRFP1                                    | scFv5T4 from pUC57::scFv5T4 inserted into <i>NcoI</i> and <i>Hind</i> III sites of pET-32a; mRFP1 inserted into <i>Eco</i> RI and <i>Hind</i> III sites replacing biotin tag of scFv5T4; Ap <sup>r</sup>                              | This study |
| pET-32a::TEV::scFv5T4::biotin tag                          | scFv5T4 from pUC57::scFv5T4 inserted into <i>NcoI</i> and <i>Hind</i> III sites of pET-32a; Ap <sup>r</sup>                                                                                                                           | This study |
| pET-32a::TEV::scFv5T4::speC <sub>D203A</sub> ::biotin      | scFv5T4 from pUC57::scFv5T4 inserted into <i>NcoI</i> and <i>Hind</i> III sites of pET-32a; translationally fused with speC <sub>D203A</sub> with an engineered gly-gly-pro (GGP) linker; C-terminal biotin tag; Ap <sup>r</sup>      | This study |
| pET-32a::TEV::scFv5T4::speC <sub>Y15A/D203A</sub> ::biotin | scFv5T4 from pUC57::scFv5T4 inserted into <i>NcoI</i> and <i>Hind</i> III sites of pET-32a; translationally fused with speC <sub>Y15A/D203A</sub> with an engineered gly-gly-pro (GGP) linker; C-terminal biotin tag; Ap <sup>r</sup> | This study |
| pCMV6-XL5                                                  | Mammalian expression vector; Ap <sup>r</sup>                                                                                                                                                                                          | Origene    |
| pCMV6-XL5::egfp                                            | egfp from pEGFP-N1 inserted into <i>SacI</i> and <i>XbaI</i> sites of pCMV6-XL5; Ap <sup>r</sup>                                                                                                                                      | This study |
| pCMV6-XL5::5t4                                             | 5T4 inserted into <i>Eco</i> RI and <i>SalI</i> sites of pCMV6-XL5; Ap <sup>r</sup>                                                                                                                                                   | Origene    |
| pEGFP-N1                                                   | Mammalian expression vector with N-terminal EGFP tag; Km <sup>r</sup>                                                                                                                                                                 | Clontech   |
| pEGFP-N1::5t4                                              | 5t4 from pCMV6-XL5::5t4 inserted into <i>Eco</i> RI and <i>Bam</i> HI sites of pEGFP-N1; Km <sup>r</sup>                                                                                                                              | This study |

<sup>a</sup> Km<sup>r</sup>, Kanamycin resistance; Ap<sup>r</sup>, Ampicillin resistance; Cm<sup>r</sup>, Chloramphenicol resistance
